# Supplementary material for: In situ formation of porous LiCuVO4/LiVO3/C nanotubes as a high-capacity anode material for lithium ion batteries
Source: Royal Society of Chemistry journal article supplement (doi:10.1039/c9qi01040h), 2019-10-02
Supplement: c9qi01040h1.pdf [file c9qi01040h1.pdf]

## **Electronic Supplementary Information**

### ***In situ* formation of porous LiCuVO<sub>4</sub>/LiVO<sub>3</sub>/C nanotubes as high-capacity anode material for lithium ion batteries**

Rong Cui<sup>a</sup>, Jiande Lin<sup>a</sup>, Xinxin Cao<sup>a</sup>, Pengfei Hao<sup>a</sup>, Xuefang Xie<sup>a</sup>, Shuang Zhou<sup>a</sup>, Yaping Wang<sup>a</sup>, Shuquan Liang<sup>a,b</sup> and Anqiang Pan<sup>a,b,\*</sup>

<sup>a</sup> School of Materials Science & Engineering, Central South University, Changsha 410083, Hunan, China

<sup>b</sup> Key Laboratory of Nonferrous Metal Materials Science and Engineering, Ministry of Education, Central South University, Changsha 410083, Hunan, China

\* Corresponding author: [pananqiang@csu.edu.cn](mailto:pananqiang@csu.edu.cn) (A.Q. Pan)

## Table of Contents

|                                                                                                                                                                                                                                                   |    |
|---------------------------------------------------------------------------------------------------------------------------------------------------------------------------------------------------------------------------------------------------|----|
| <b>Figure S1</b> The X-ray diffraction pattern of LCVO-500.....                                                                                                                                                                                   | S1 |
| <b>Figure S2.</b> Raman scattering spectra of the LCVO-450, LCVO-250 and LCVO-precursor.....                                                                                                                                                      | S1 |
| <b>Figure S3.</b> TG/DSC curve of the LCVO-500 annealed from room temperature to 650 °C at a temperature ramping rate of 10 °C min <sup>-1</sup> in air.....                                                                                      | S2 |
| <b>Figure S4.</b> The FESEM images of LCVO-500 at low and high magnifications.....                                                                                                                                                                | S2 |
| <b>Figure S5.</b> The rate performance of the LCVO-450 electrode with high mass loading (1.32 mg cm <sup>-2</sup> ) .....                                                                                                                         | S3 |
| <b>Figure S6.</b> SEM images of (a) LCVO-450 electrode, and (b) LCVO-450 powder after ultrasonic dispersion after rate-capability tests at various current densities from 0.1 to 2 A g <sup>-1</sup> .....                                        | S3 |
| <b>Table S1.</b> Refined unit cell lattice parameters of LiCuVO <sub>4</sub> and LiVO <sub>3</sub> in LiCuVO <sub>4</sub> /LiVO <sub>3</sub> /C and the standard data of LiCuVO <sub>4</sub> (15836-ICSD) and LiVO <sub>3</sub> (2899-ICSD) ..... | S4 |
| <b>Table S2.</b> Electrochemical performance comparison of LiCuVO <sub>4</sub> , LiVO <sub>3</sub> and relevant materials for lithium ion batteries.....                                                                                          | S4 |

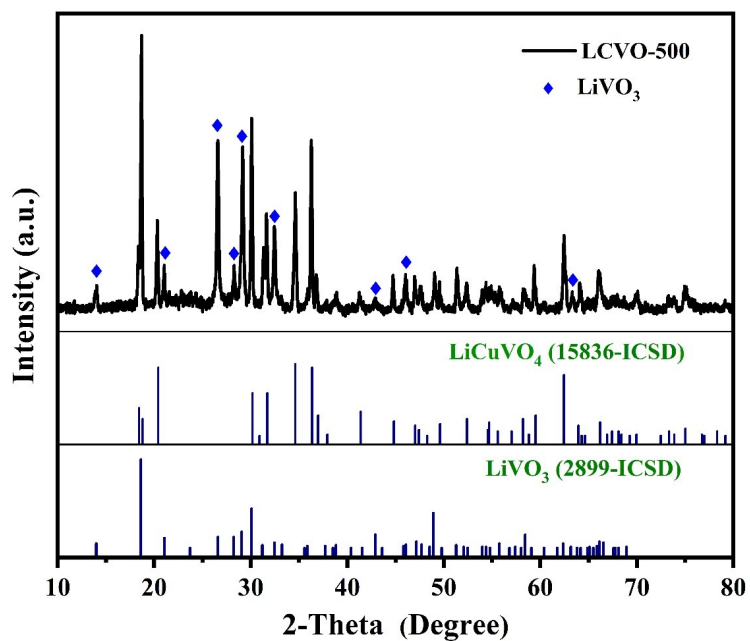

**Figure S1** The X-ray diffraction pattern of LCVO-500.

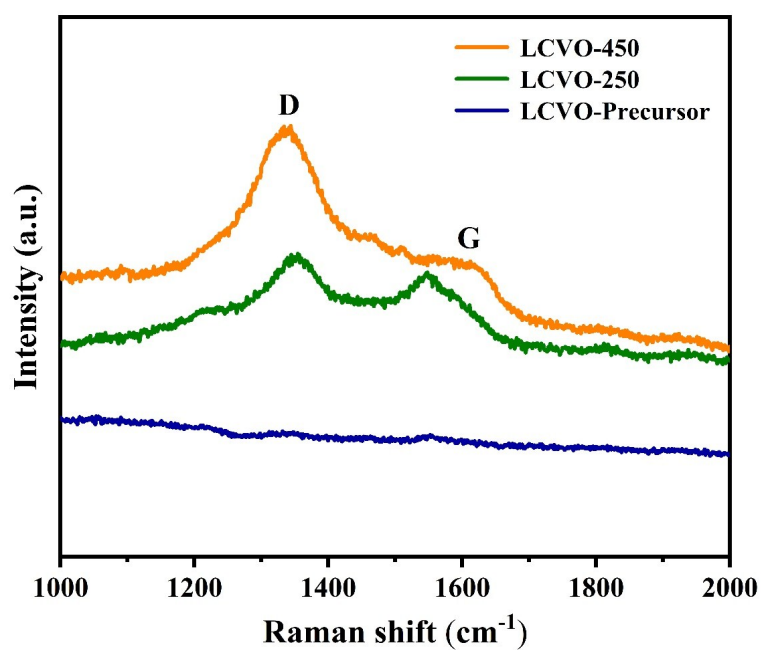

**Figure S2.** Raman scattering spectra of the LCVO-450, LCVO-250 and LCVO-precursor.

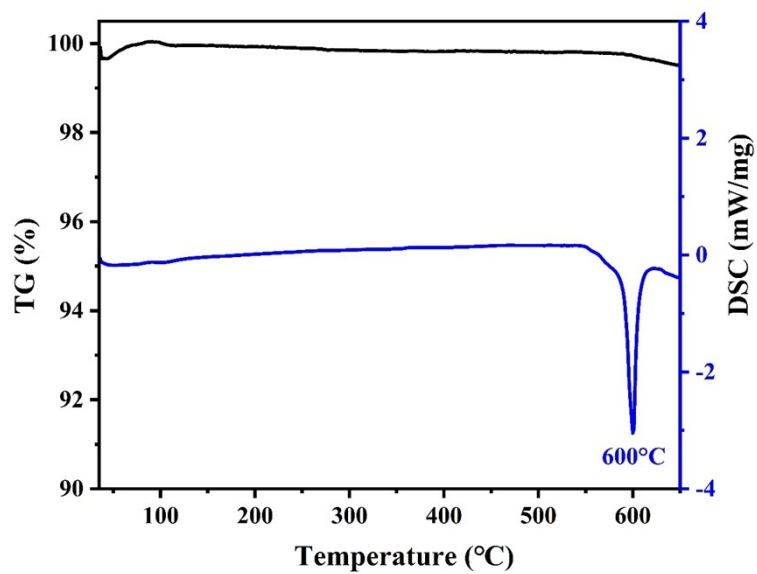

**Figure S3.** TG/DSC curve of the LCVO-500 annealed from room temperature to 650 °C at a temperature ramping rate of 10 °C min<sup>-1</sup> in air.

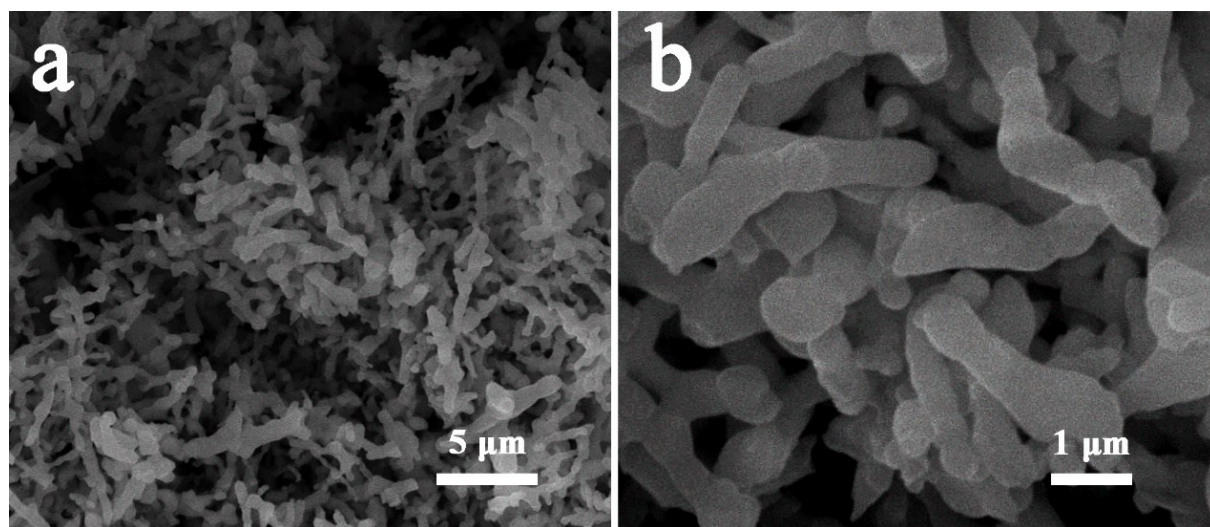

**Figure S4.** The FESEM images of LCVO-500 at low and high magnifications.

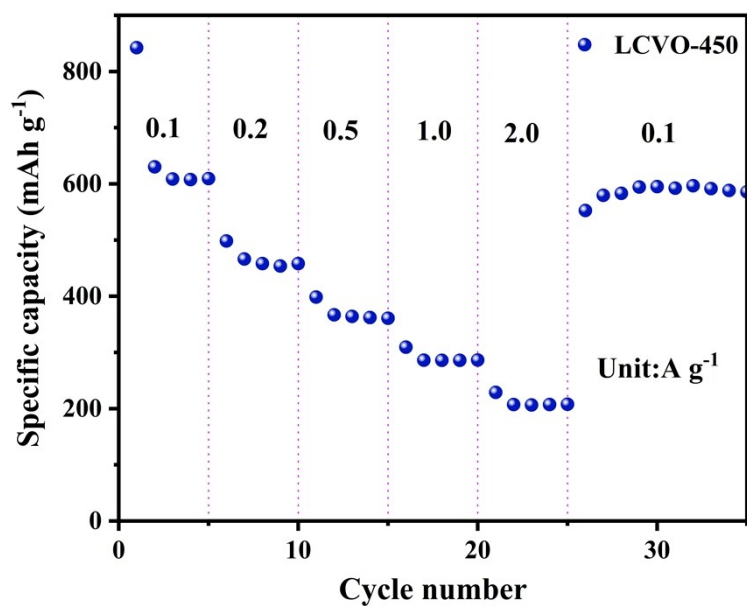

**Figure S5.** The rate performance of the LCVO-450 electrode with high mass loading (1.32 mg cm<sup>-2</sup>).

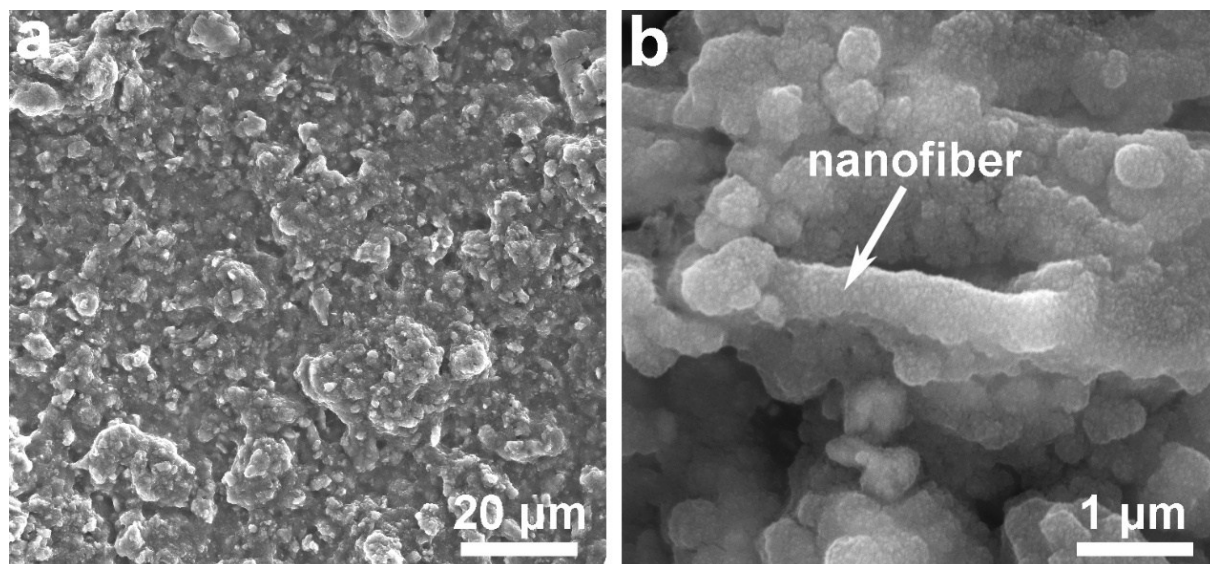

**Figure S6.** SEM images of (a) LCVO-450 electrode, and (b) LCVO-450 powder after ultrasonic dispersion after rate-capability tests at various current densities from 0.1 to 2 A g<sup>-1</sup>.

**Table S1.** Refined unit cell lattice parameters of LiCuVO<sub>4</sub> and LiVO<sub>3</sub> in LiCuVO<sub>4</sub>/LiVO<sub>3</sub>/C and the standard data of LiCuVO<sub>4</sub> (15836-ICSD) and LiVO<sub>3</sub> (2899-ICSD).

| sample                          | Lattice parameters |         |         |             |                      | Phase content (wt%) | Evaluation parameters |        |                      |
|---------------------------------|--------------------|---------|---------|-------------|----------------------|---------------------|-----------------------|--------|----------------------|
|                                 | a (nm)             | b (nm)  | c (nm)  | $\beta$ (°) | V (nm <sup>3</sup> ) |                     | Rwp (%)               | Rp (%) | CHI <sup>2</sup> (%) |
| LiCuVO <sub>4</sub> in LCVO-450 | 0.5658             | 0.58087 | 0.87139 | 90.0000     | 0.28637              | 24.6                | 9.62                  | 7.56   | 4.44                 |
| LiCuVO <sub>4</sub>             | 0.5652             | 0.58100 | 0.87500 | 90.0000     | 0.28733              | —                   | —                     | —      | —                    |
| LiVO <sub>3</sub> in LCVO-450   | 1.0153             | 0.84377 | 0.58837 | 110.4740    | 0.47223              | 75.4                | 9.62                  | 7.56   | 8.33                 |
| LiVO <sub>3</sub>               | 1.0158             | 0.84175 | 0.58853 | 110.4800    | 0.47142              | —                   | —                     | —      | —                    |

**Table S2** Electrochemical performance comparison of LiCuVO<sub>4</sub>, LiVO<sub>3</sub> and relevant materials for lithium ion batteries.

| Samples                                                  | Current density (mA g <sup>-1</sup> ) | Cycle number (n) | Capacity (mA h g <sup>-1</sup> ) | Initial Capacity (mA h g <sup>-1</sup> ) |
|----------------------------------------------------------|---------------------------------------|------------------|----------------------------------|------------------------------------------|
| LiCuVO <sub>4</sub> powder <sup>1</sup>                  | 200                                   | 50               | ~400                             | 680                                      |
| Interconnected LiCuVO <sub>4</sub> networks <sup>2</sup> | 100                                   | 50               | ~580                             | 875                                      |
| LiVO <sub>3</sub> <sup>3</sup>                           | 100                                   | 50               | ~700                             | 1300                                     |
| Li <sub>3</sub> VO <sub>4</sub> /C/rGO <sup>4</sup>      | 50                                    | 200              | ~387                             | 712                                      |
| Li <sub>3</sub> VO <sub>4</sub> /C <sup>5</sup>          | 400                                   | 100              | ~394                             | 570                                      |
| LCVO-450                                                 | 100                                   | 50               | ~576                             | 910                                      |

## References

1. M. Li, X. Yang, C. Wang, N. Chen, F. Hu, X. Bie, Y. Wei, F. Du and G. Chen, *J. Mater. Chem. A*, 2015, **3**, 586-592.
2. L. Wang, Y. Dong, K. Zhao, W. Luo, S. Li, L. Zhou and L. Mai, *Phys. Chem. Chem. Phys.*, 2017, **19**, 13341-13347.
3. J. Lee, J. Moon, O. Chae, J. Lee, J. Ryu, M. Cho, K. Cho and S. Oh, *Chem. Mater.*, 2016, **28**, 5314-5320.
4. Y. Yang, J. Li, J. Huang, J. Huang, J. Zeng and J. Zhao, *Electrochim. Acta*, 2017, **247**, 771-778.
5. Z. Liang, Z. Lin, Y. Zhao, Y. Dong, Q. Kuang, X. Lin, X. Liu and D. Yan, *J. Power Sources*, 2015, **274**, 345-354.
